# Supplementary material for: Impact of the COVID-19 pandemic on the symptomatology and routine of medicated patients with obsessive-compulsive disorder
Source: PubMed Central journal article supplement (PMC11189129; doi:10.47626/1516-4446-2023-3333), 2024-03-25
Supplement: bjp-46-e20233333-s001.pdf [file bjp-46-e20233333-s001.pdf]

<http://doi.org/10.47626/1516-4446-2023-3333>

Impact of the COVID-19 pandemic on the symptomatology and routine of medicated patients with obsessive-compulsive disorder – Almeida NB et al.

**Table S1** Distribution of CRISIS item responses related to exposure to stressful events in the entire sample (n = 58)

| <b>Question</b>                                                                                                                        | <b>Not at all</b> | <b>Slightly</b> | <b>Moderately</b> | <b>Very</b> | <b>Extremely</b> |
|----------------------------------------------------------------------------------------------------------------------------------------|-------------------|-----------------|-------------------|-------------|------------------|
| 25 - How worried have you been about your friends and family getting infected?                                                         | 8 (13.7%)         | 16 (27.5%)      | 9 (15.5%)         | 17 (29.3%)  | 8 (13.7%)        |
| 26 - How worried have you been about your physical health being influenced by COVID-19?                                                | 12 (20.6%)        | 14 (24.1%)      | 9 (15.5%)         | 14 (24.1%)  | 9 (15.5%)        |
| 27 - How worried have you been about your mental health being influenced by COVID-19?                                                  | 9 (15.5%)         | 10 (17.2%)      | 11 (18.9%)        | 17 (29.3%)  | 11 (18.9%)       |
| 28 - How much are you reading or talking about Coronavirus/COVID-19?                                                                   | 0 (0%)            | 6 (10.3%)       | 19 (32.7%)        | 27 (46.5%)  | 6 (10.3%)        |
| 29 - Has the Coronavirus/COVID-19 crisis in your area led to any positive changes in your life?                                        | 0 (0%)            | 25 (43.1%)      | 14 (24.1%)        | 19 (32.7%)  | 0 (0%)           |
| 34 - How stressful have the restrictions on leaving home been for you?                                                                 | 7 (12%)           | 12 (20.6%)      | 13 (22.4%)        | 13 (22.4%)  | 13 (22.4%)       |
| 40 - How stressful have the restrictions on leaving home been for you?                                                                 | 13 (22.4%)        | 15 (25.8%)      | 15 (25.8%)        | 9 (15.5%)   | 6 (10.3%)        |
| 41 - How much has the cancellation of important events (such as graduation, prom, vacation, etc.) in your life been difficult for you? | 16 (27.5%)        | 14(24.1%)       | 17(29.3%)         | 7 (12%)     | 4(6.8%)          |
| 45 - How much hope do you have about the COVID-19 crisis where you live will be resolved soon?                                         | 10 (17.2%)        | 18 (31.0%)      | 14 (24.1%)        | 12 (20.6%)  | 4 (4.8%)         |

**Table S2** Comparison between patients with (n = 44) and without (n = 14) cleaning symptoms regarding CRISIS items specifically related to exposure to stressful events

|          | <b>W</b> | <b>p-value<sup>†</sup></b> |
|----------|----------|----------------------------|
| crisis25 | 462.000  | <b>0.004</b>               |
| crisis26 | 421.000  | 0.037                      |
| crisis27 | 421.500  | 0.035                      |
| crisis28 | 355.000  | 0.363                      |
| crisis29 | 336.500  | 0.586                      |
| crisis34 | 338.500  | 0.577                      |
| crisis40 | 342.000  | 0.532                      |
| crisis41 | 296.500  | 0.836                      |
| crisis45 | 260.000  | 0.374                      |

<sup>†</sup> Mann-Whitney U test, Bonferroni correction (< 0.0056). Significant p-values in bold font.

**Table S3** Comparison between patients with (n=18) and without (n=40) exposure to COVID-infected individuals regarding CRISIS items specifically related to exposure to stressful events

|          | <b>W</b> | <b>p-value<sup>†</sup></b> |
|----------|----------|----------------------------|
| crisis25 | 364.000  | 0.952                      |
| crisis26 | 337.500  | 0.705                      |
| crisis27 | 369.000  | 0.884                      |
| crisis28 | 329.500  | 0.587                      |
| crisis29 | 346.500  | 0.815                      |
| crisis34 | 258.000  | 0.081                      |
| crisis40 | 239.500  | 0.038                      |
| crisis41 | 307.000  | 0.362                      |
| crisis45 | 248.000  | 0.054                      |

<sup>†</sup> Mann-Whitney U test, Bonferroni correction (<0.0056).

**Table S4** Correlation coefficients between CRISIS items specifically related to exposure to stressful events in the entire sample (n=58) and total OCI-R, BAI, and BDI scores.

|           | OCI-R                    | BAI                      | BDI                      |
|-----------|--------------------------|--------------------------|--------------------------|
| CRISIS 25 | 0.269                    | 0.190                    | 0.258                    |
| CRISIS 26 | <b>0.300<sup>†</sup></b> | 0.245                    | 0.272                    |
| CRISIS 27 | 0.230                    | 0.239                    | <b>0.391<sup>†</sup></b> |
| CRISIS 28 | 0.078                    | 0.127                    | 0.238                    |
| CRISIS 29 | 0.109                    | 0.084                    | 0.101                    |
| CRISIS 34 | 0.069                    | 0.201                    | 0.246                    |
| CRISIS 40 | 0.012                    | 0.224                    | 0.280                    |
| CRISIS 41 | -0.057                   | <b>0.340<sup>†</sup></b> | 0.224                    |
| CRISIS 45 | -0.207                   | 0.051                    | -0.027                   |

<sup>†</sup> Kendall's Tau Correlation, Bonferroni correction (separately for OCI-R, BAI, and BDI). Significant p-values in bold font (alpha value < 0.0056).

**Table S5** Correlation coefficients between CRISIS items specifically related to exposure to stressful events in OCD patients with cleaning symptoms (n=44) and total OCI-R, BAI, and BDI scores.

|           | OCI-R  | BAI    | BDI    |
|-----------|--------|--------|--------|
| CRISIS 25 | 0.297  | 0.228  | 0.301  |
| CRISIS 26 | 0.243  | 0.204  | 0.126  |
| CRISIS 27 | 0.230  | 0.169  | 0.267  |
| CRISIS 28 | 0.027  | 0.112  | 0.194  |
| CRISIS 29 | -0.038 | 0.173  | 0.129  |
| CRISIS 34 | 0.044  | 0.060  | 0.188  |
| CRISIS 40 | -0.008 | 0.101  | 0.269  |
| CRISIS 41 | -0.140 | 0.338  | 0.247  |
| CRISIS 45 | -0.174 | -0.051 | -0.083 |

<sup>†</sup> Kendall's Tau Correlation, Bonferroni correction (separately for OCI-R, BAI, and BDI). Alpha value < 0.0056.
